## Gender differences low-density lipoprotein cholesterol reduction with PCSK9 inhibitors in real world patients

A. Cordero<sup>1</sup>, M.R. Fernandez Del Olmo<sup>2</sup>, G.A. Cortez Quiroga<sup>3</sup>, C. Romero<sup>4</sup>, L. Facila<sup>5</sup>, A. Fornovi<sup>6</sup>, J. Rondan<sup>7</sup>, M.C. Bello Mora<sup>8</sup>, A. Valle<sup>9</sup>, A.L.B.E.R.T. Sandin<sup>10</sup>, R. Freixa<sup>11</sup>, S. Sanchez-Alvarez<sup>12</sup>, P. Blanch<sup>11</sup>, M. Clemente Lorente<sup>13</sup>, J.R. Gonzalez-Juanatey<sup>14</sup>

<sup>1</sup>University Hospital of San Juan, Alicante, Spain; <sup>2</sup>University Hospital of Jaen, Jaen, Spain; <sup>3</sup>Hospital Alto Guadalquivir, Andujar, Spain; <sup>4</sup>Parc Sanitari Sant Joan de Déu, Cardiology, Sant Boi de Llobregat, Spain; <sup>5</sup>University General Hospital of Valencia, Valencia, Spain; <sup>6</sup>Vega Baja Hospital, Orihuela, Spain; <sup>7</sup>University Hospital of Cabueñes, Gijon, Spain; <sup>8</sup>University Hospital of Araba, Vitoria-Gasteiz, Spain; <sup>9</sup>Hospital Marina Salud, Denia, Spain; <sup>10</sup>General University Hospital of Alicante, Alicante, Spain; <sup>11</sup>Hospital Moises Broggi, Barcelona, Spain; <sup>12</sup>Hospital de Xativa, Xativa, Spain; <sup>13</sup>Hospital Virgen del Puerto, Cardiology, Plasencia, Spain; <sup>14</sup>University Hospital of Santiago de Compostela, Santiago de Compostela, Spain

On behalf of LIPID-REAL study

**Funding Acknowledgement:** Type of funding sources: None.

**Background:** Monoclonal antibodies that inhibit the proprotein convertase subtilisin/kexin type 9 (PCSK9) reduce low-density lipoprotein cholesterol (LDLc) by 55%, regardless of baseline treatments, and are supposed to have a homogenous effect. We tested possible gender differences in a large multicenter registry of real-world patients treated with PCSK9 inhibitors.

**Methods:** Multicentre and retrospective registry of patients treated with PCSK9 inhibitors from 14 different hospitals from Spain. Before and on-treatment LDLc cholesterol was recorded as well as medical treatments, clinical indication and clinical features.

**Results:** A total of 562 patients were analysed, mean age 60.2 (9.6) years and 79.2% males. Most frequent indication for PCSK9 inhibitor treatment was established cardiovascular disease (CVD) with LDLc > 100 mg/dl (58.1%) followed by familial hypercholesterolemia (23.4%) and statin intolerance (18.5%). Indications other than CVD were more frequent in women (53.3% vs. 39.1%;  $p=0.03$ ). Women were more frequently ezetimibe (67.5% vs. 50.6%;  $p=0.001$ ) before PCSK9 treatment; although no gender differences in statin use was observed (78.6% vs. 83.6%;  $p=0.93$ )

in the whole cohort it was significantly lower in patients with coronary heart disease (91.4% vs. 98.9%;  $p=0.005$ ). Before treatment LDLc was 148.7 (50.1) mg/dl and it was higher women vs. men (160.3 (59.3) vs. 145.6 (47.0);  $p=0.005$ ). Evolocumab was initiated in 318 (56.6%) patients; 229 (40.7%) alirocumab 75 mg and 15 (2.7%) alirocumab 150 mg. No gender differences in PCSK9 inhibitors drug or dose were observed.

Median time to second blood determination were 187.5 (IQR 101–242) days. Mean on-treatment LDLc was 66.7 (46.4) mg/dl and it was also higher in women vs. men (84.4 (58.6) vs. 61.9 (41.3);  $p<0.001$ ). Mean LDLc reduction was 54.7% but it was higher in men as compared to women (57.0% vs. 46.1%;  $p=0.0003$ ). Higher LDLc reductions were also observed in patients with CVD as compared to the other 2 indications (57.1% vs. 47.3%;  $p=0.002$ ). Moreover, LDLc reduction with PCSK9 inhibitors treatment was also higher in men vs women among patients with CVD (58.9% vs. 48.0%;  $p=0.04$ )

**Conclusions:** This multicentre and retrospective registry of real-world patients treated with PCSK9 inhibitors highlights significant gender differences in LDLc reduction.

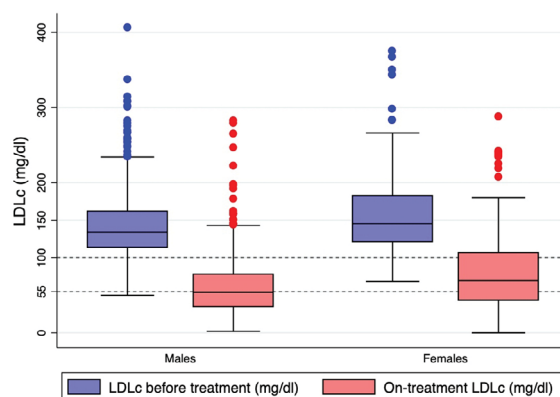

Source: http://academic.oup.com/eurheartj/article-pdf/42/Supplement_1/ehab724.2589/40596145/ehab724.2589.pdf
